# Supplementary material
Source: MDPI journal article supplement (https://www.mdpi.com/2076-3417/10/11/3702)
Supplement: s1 [file s1]

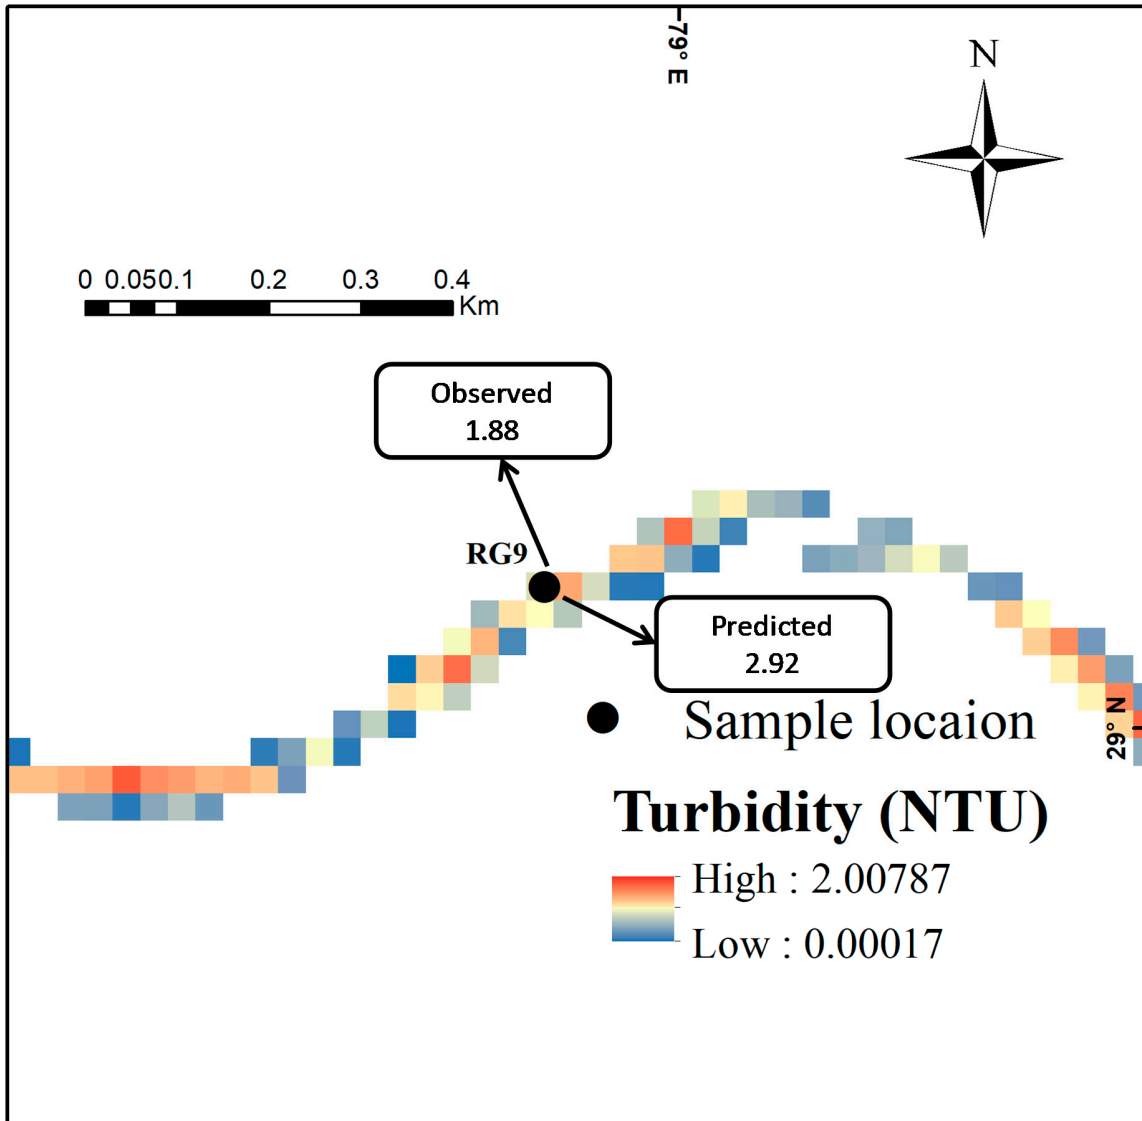

Figure S1a. Turbidity map of Ramganga River in March 6 2014.

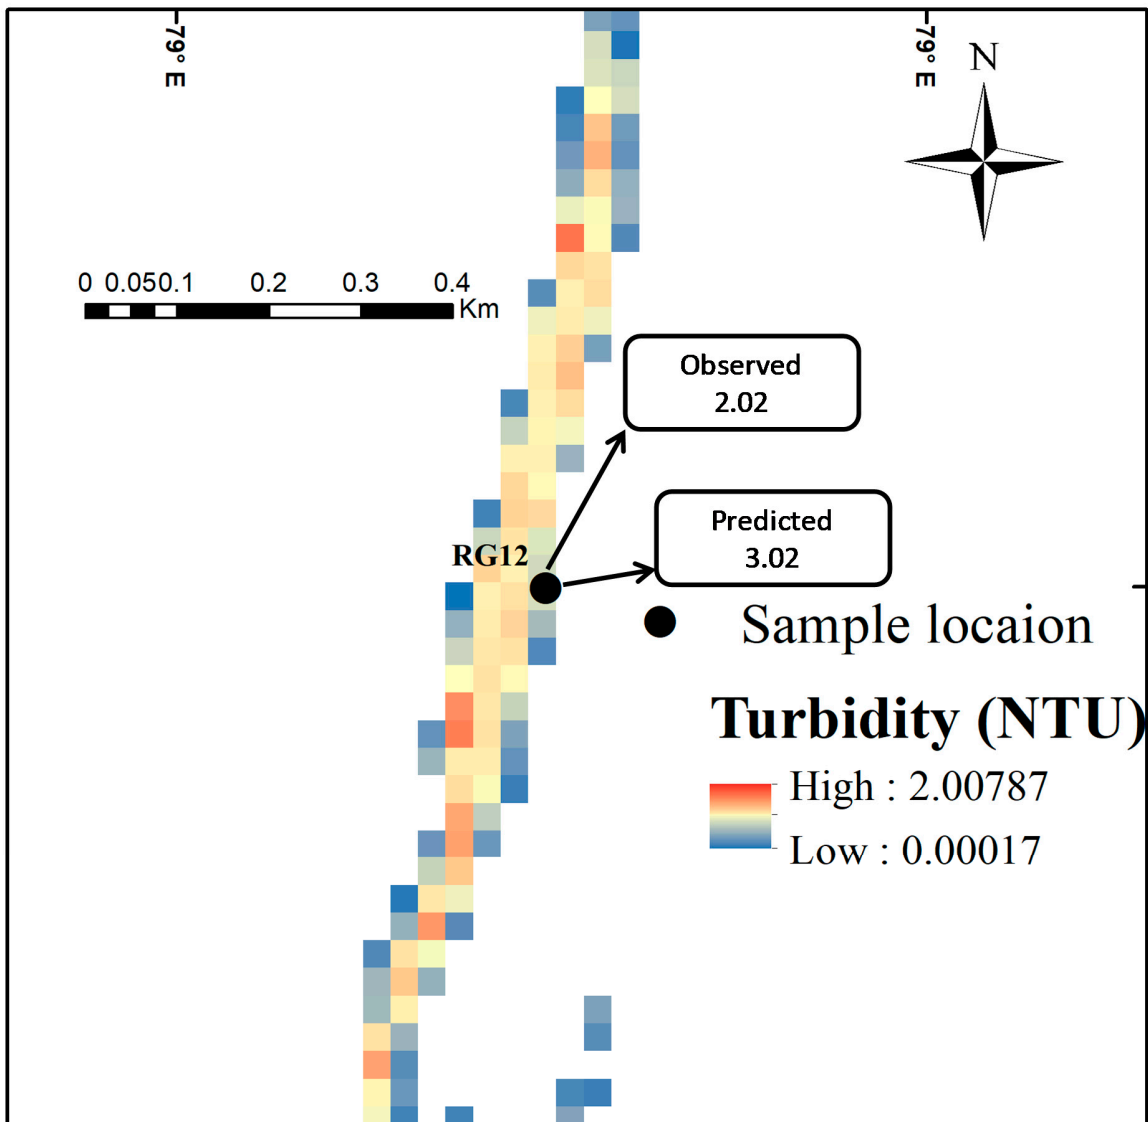

Figure S1b. Turbidity map of Ramganga River in March 6 2014.

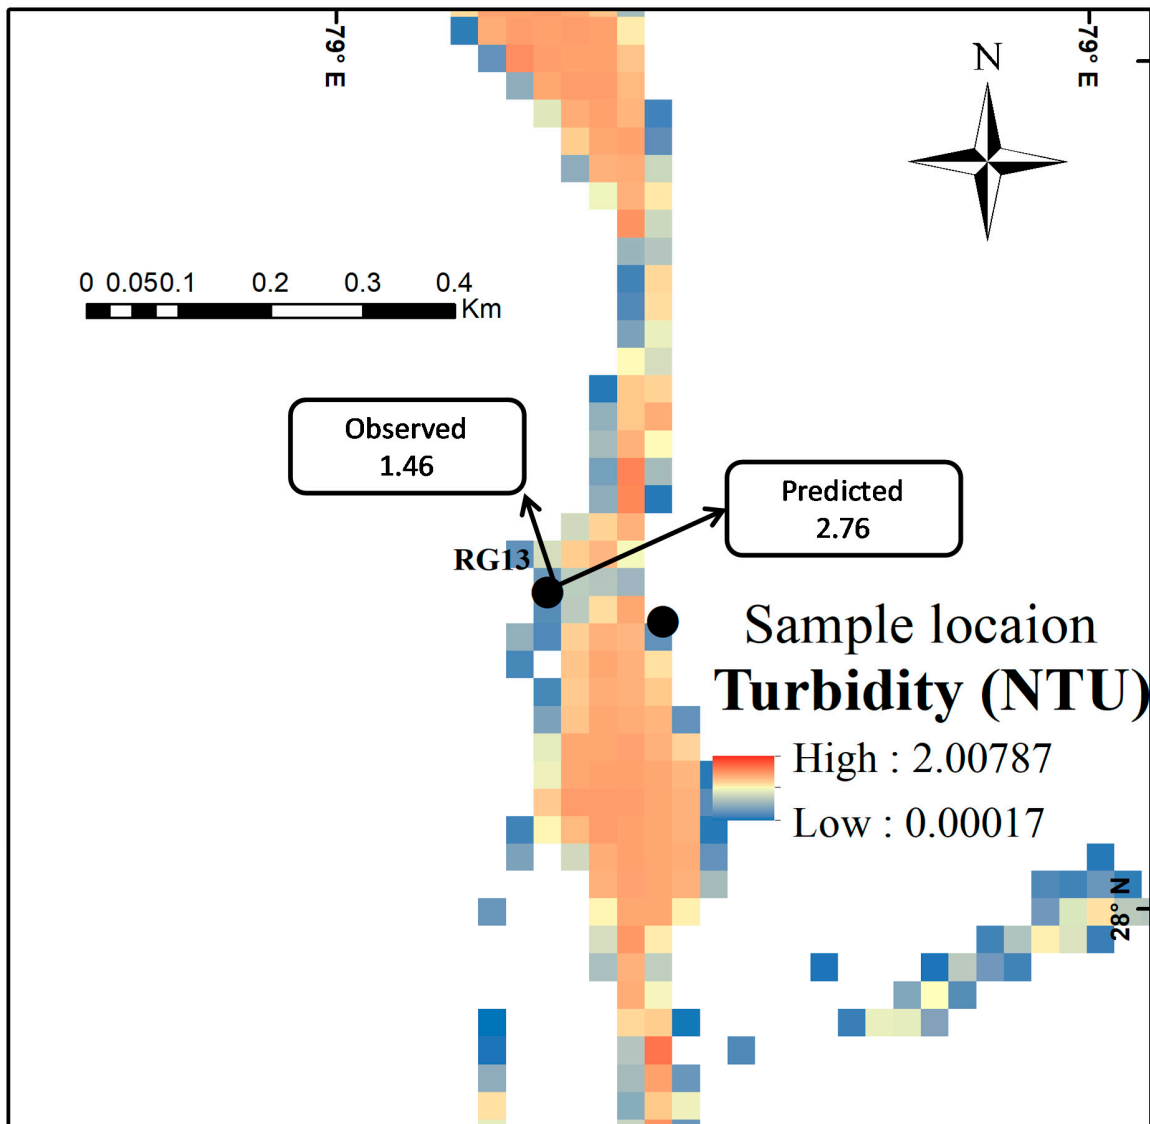

Figure S1c. Turbidity map of Ramganga River in March 6 2014.

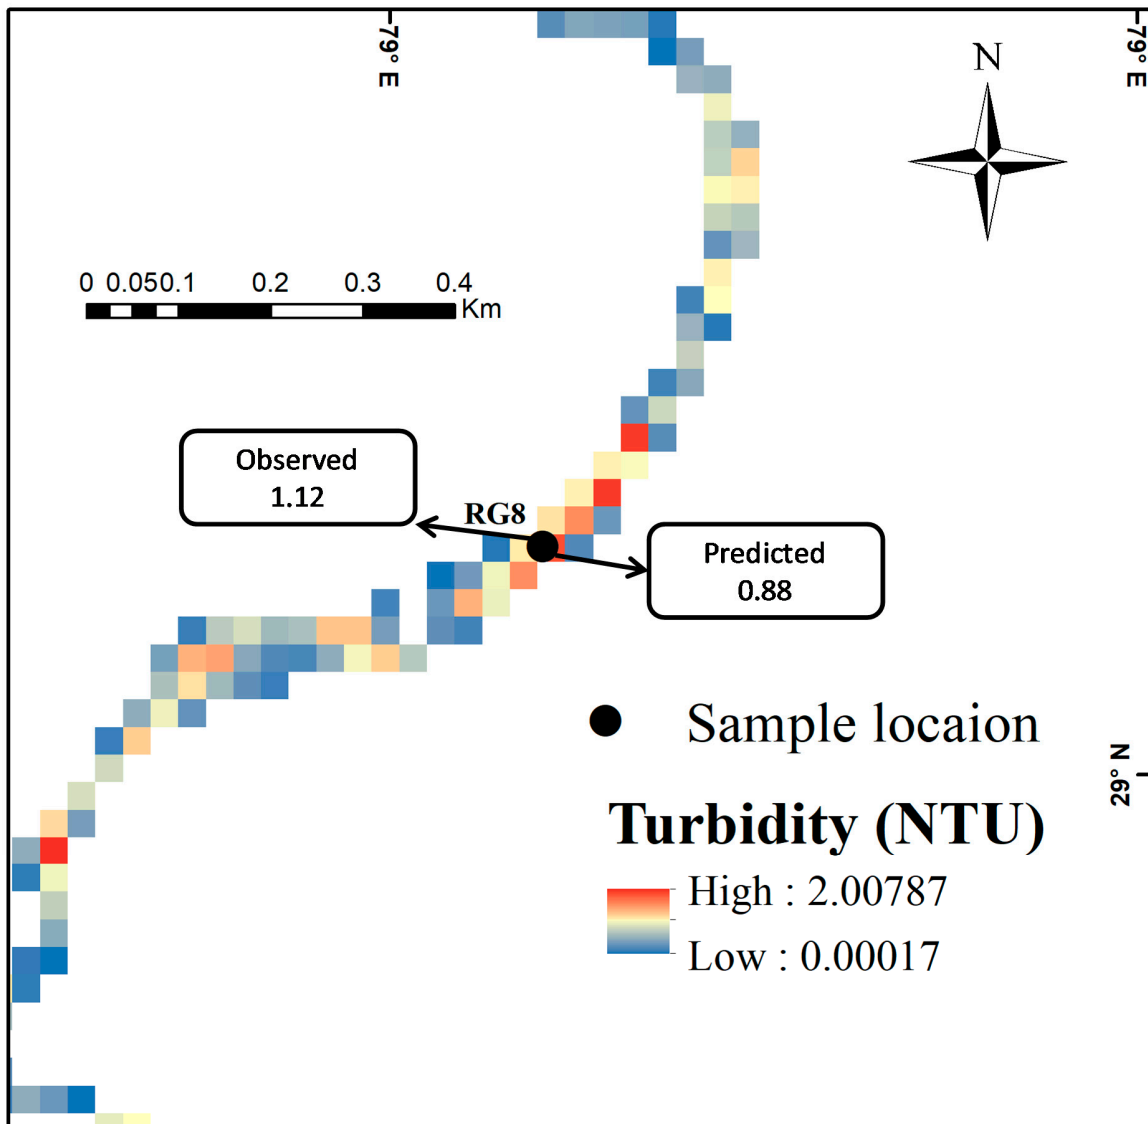

Figure S2a. Turbidity map of Ramganga River in November 11 2014.

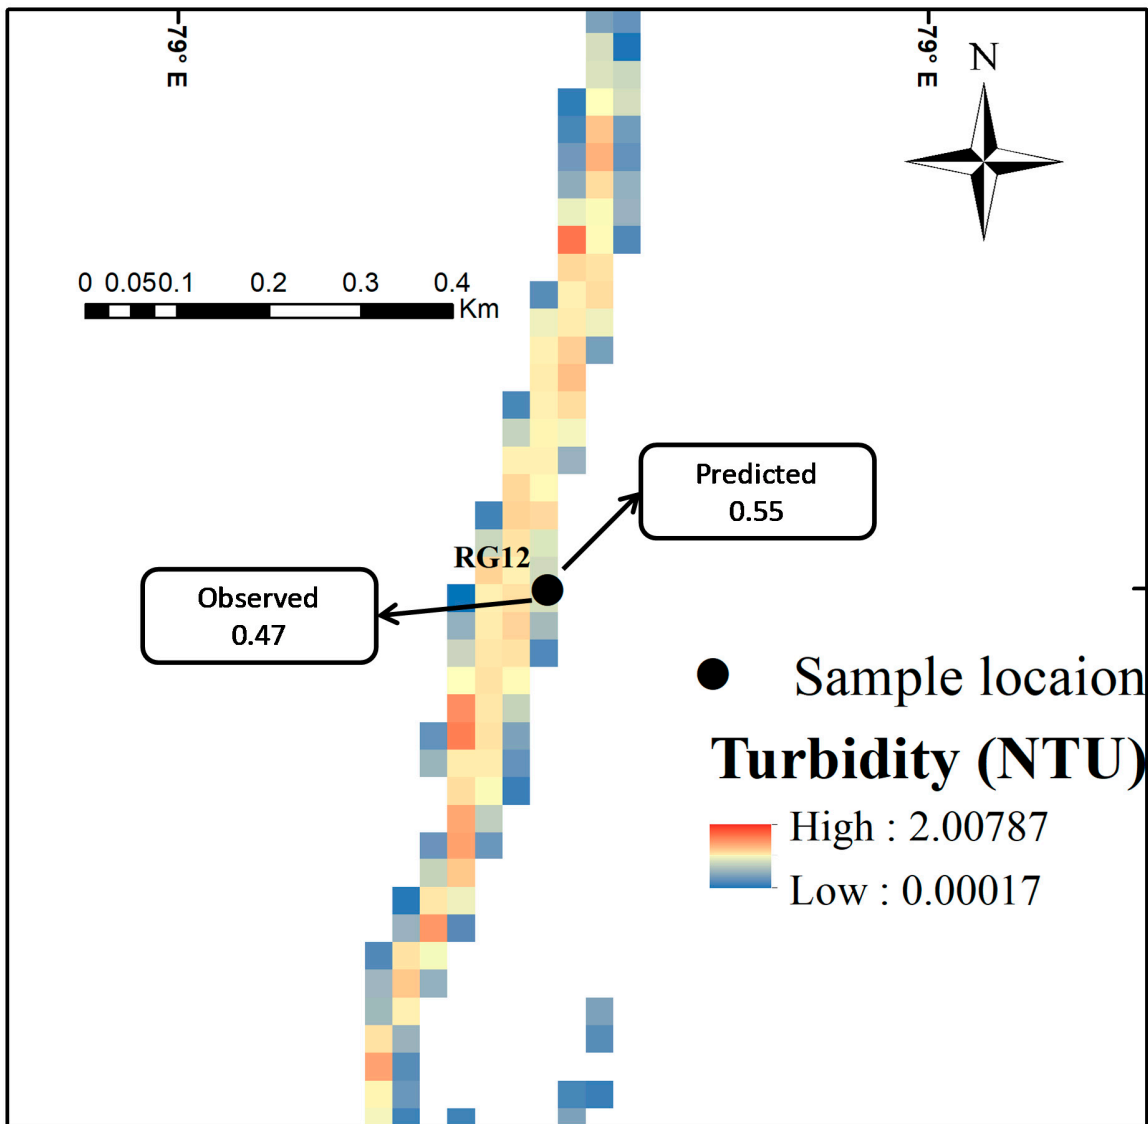

Figure S2b. Turbidity map of Ramganga River in November 11 2014.

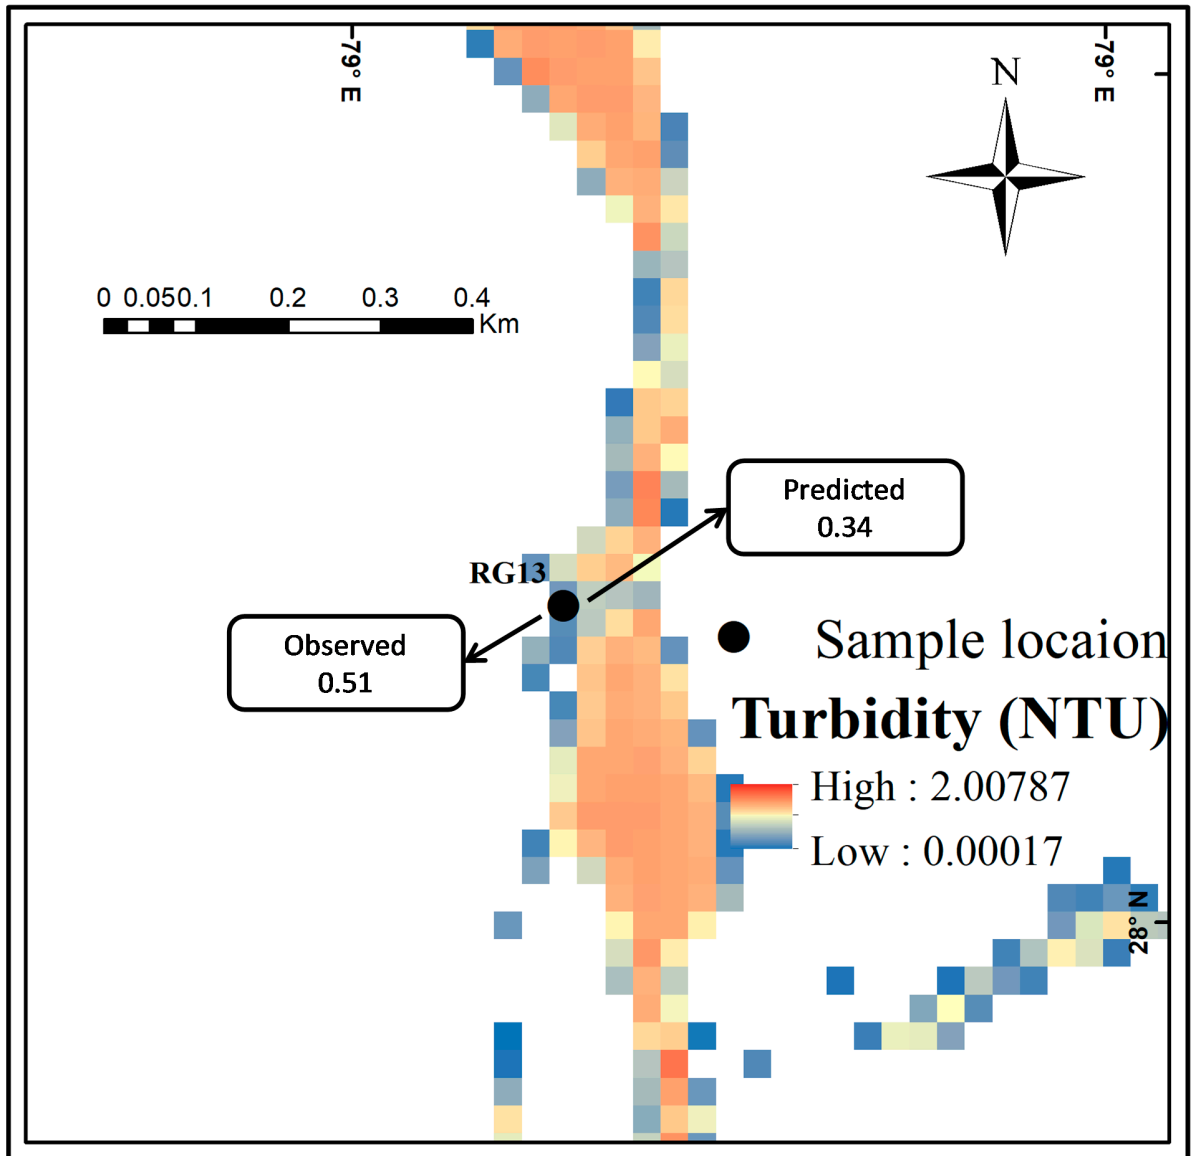

Figure S2c. Turbidity map of Ramganga River in November 11 2014.

**Table S1.** Models' summary and regression analysis statistics among turbidity concentrations and surface reflectance values for March and November 2014 (dependent variable).

|                | Model | R                  | R <sup>2</sup> | Adjusted R <sup>2</sup> | Std. Error of the Estimate | Change Statistics     |          |      |      |               | Durbin-Watson |
|----------------|-------|--------------------|----------------|-------------------------|----------------------------|-----------------------|----------|------|------|---------------|---------------|
|                |       |                    |                |                         |                            | R <sup>2</sup> Change | F Change | df 1 | df 2 | Sig. F Change |               |
| March, 2014    | 1     | .748 <sup>a</sup>  | 0.56           | 0.5                     | 0.2                        | -0.08                 | 1.33     | 1    | 7    | 0.02          | 1.357         |
| November, 2014 | 1     | 0.854 <sup>b</sup> | 0.729          | 0.638                   | 0.217                      | 0.729                 | 8.061    | 2    | 6    | 0.02          |               |
|                | 2     | 0.852 <sup>c</sup> | 0.726          | 0.687                   | 0.202                      | -0.002                | 0.052    | 1    | 6    | 0.828         | 1.972         |

**Table S2.** Variables entered/removed from turbidity predictive models relying upon the regression method utilized for March and November 2014.

|                | Model | Variable Entered | Variables Removed | Method                                                        |
|----------------|-------|------------------|-------------------|---------------------------------------------------------------|
| March, 2014    | 1     | b2/b4            |                   | Enter                                                         |
|                | 1     | b2/b4, b2/b3     |                   | Enter                                                         |
| November, 2014 | 2     |                  | b2/b4             | Backward (criterion: Probability of F-to-remove $\geq$ 0.100) |

**Table S3.** Comparison of satellites retrieved and in-situ observed turbidities values at 9 sampling sites of Ramganga River in March and November 2014 with statistical analysis for squared residual, root mean square (RMSE).

| Stations | Observed Turbidity | Predicted Turbidity | Square Residual  | RMSE             |
|----------|--------------------|---------------------|------------------|------------------|
|          | March (November)   | March (November)    | March (November) | March (November) |
| RG6      | 1.391 (1.152)      | 2.329 (1.33)        | 0.879 (0.032)    |                  |
| RG7      | 1.721 (0.949)      | 2.731 (0.876)       | 1.02 (0.005)     |                  |
| RG8      | 1.314 (1.124)      | 2.454 (0.883)       | 1.3 (0.058)      |                  |
| RG9      | 1.88 (1.88)        | 2.917 (0.939)       | 1.075 (0.062)    |                  |
| RG10     | 2.049 (0.398)      | 2.684 (0.647)       | 0.403 (0.062)    | 1.013 (0.178)    |
| RG11     | 2 (0.362)          | 2.82 (0.406)        | 0.672 (0.002)    |                  |
| RG12     | 2.025 (0.462)      | 3.023 (0.555)       | 0.994 (0.009)    |                  |
| RG13     | 1.461 (0.505)      | 2.76 (0.337)        | 1.687 (0.028)    |                  |
| RG14     | 1.62 (0.431)       | 2.716 (0.603)       | 1.201 (0.029)    |                  |
